# Supplementary material for: Conspiracy beliefs and COVID-19 guideline adherence in adolescent psychiatric outpatients: the predictive role of adverse childhood experiences
Source: Child Adolesc Psychiatry Ment Health. 2023 Jan 24;17:13. doi: 10.1186/s13034-022-00554-y (PMC9873214; doi:10.1186/s13034-022-00554-y)

**Supplementary Material**

**Conspiracy Beliefs and COVID-19 Guideline Adherence in Adolescent Psychiatric Outpatients: The Predictive Role of Adverse Childhood Experiences**

Andreas Goreis1,2, Bettina Pfeffer1,2, Heidi Zesch1,2, Diana Klinger1,2, Tamara Reiner1,2, Mercedes M. Bock3, Susanne Ohmann1,2, Petra Sackl-Pammer1,2, Sonja Werneck-Rohrer1,2, Harald Eder1,2, Katrin Skala1,2, Klara Czernin1,2, Dunja Mairhofer1,2, Bernhard Rohringer1,2, Carolin Bedus1, Ronja Lipp1, Christine Vesely1,2, Paul L. Plener1,2,4, Oswald D. Kothgassner1,2

Correspondence to: Mag. Dr. Oswald D. Kothgassner, Department of Child and Adolescent Psychiatry, Medical University of Vienna, E-Mail: [oswald.kothgassner@meduniwien.ac.at](mailto:oswald.kothgassner@meduniwien.ac.at)

**1: Model Assumptions of Our Confirmatory Analyses**

In this supplementary material, we report assumption tests of multiple regression analyses. The two conspiracy beliefs variables (i.e., specific and generic) were highly correlated in our sample (*r* = .86, *p* < .001). However, they were modeled in separate analyses as separate predictors, and multicollinearity was not an issue or a statistical assumption for these two conspiracy beliefs variables. All subsequent assumption tests of the remaining variables are reported below.

**Associations of Specific Conspiracy Beliefs and Adherence to Protective Guidelines**

For our first multiple regression, the data met the assumption of collinearity (all VIFs < 1.06), normality (Shapiro-Wilk *p* = .459), and independent errors (Durbin-Watson value = 2.45). Supplementary Figure 1 depicts additional model diagnostics—and visual inspection demonstrates that the data also met the assumptions of homogeneity of variance and linearity.

Figure S1: Visual check of model assumptions for the multiple regression of COVID-19-specific conspiracy beliefs and adherence to protective guidelines.


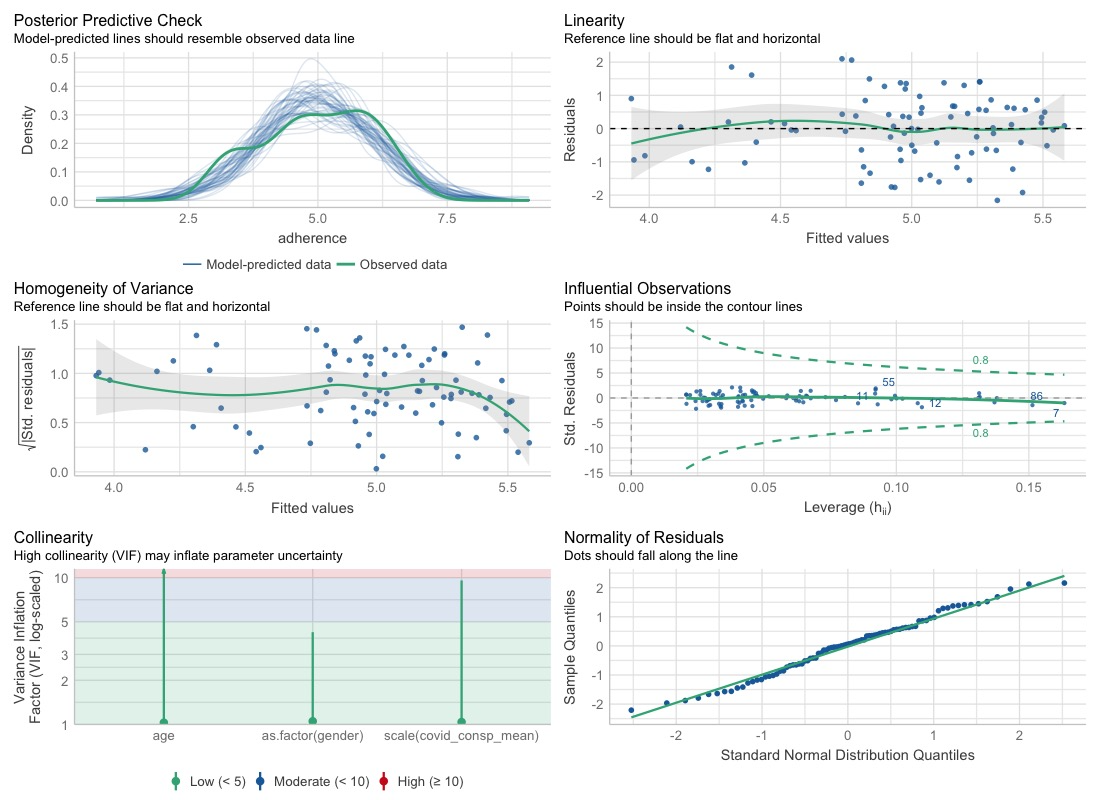


**Associations of Generic Conspiracy Beliefs and Adherence to Protective Guidelines**

For our second multiple regression, the data met the assumption of collinearity (all VIFs < 1.04), normality (Shapiro-Wilk *p* = .314), and independent errors (Durbin-Watson value = 2.48). Supplementary Figure 2 depicts additional model diagnostics—and visual inspection demonstrates that the data also met the assumptions of homogeneity of variance and linearity.

Figure S2: Visual check of model assumptions for the multiple regression of generic conspiracy beliefs and adherence to protective guidelines.


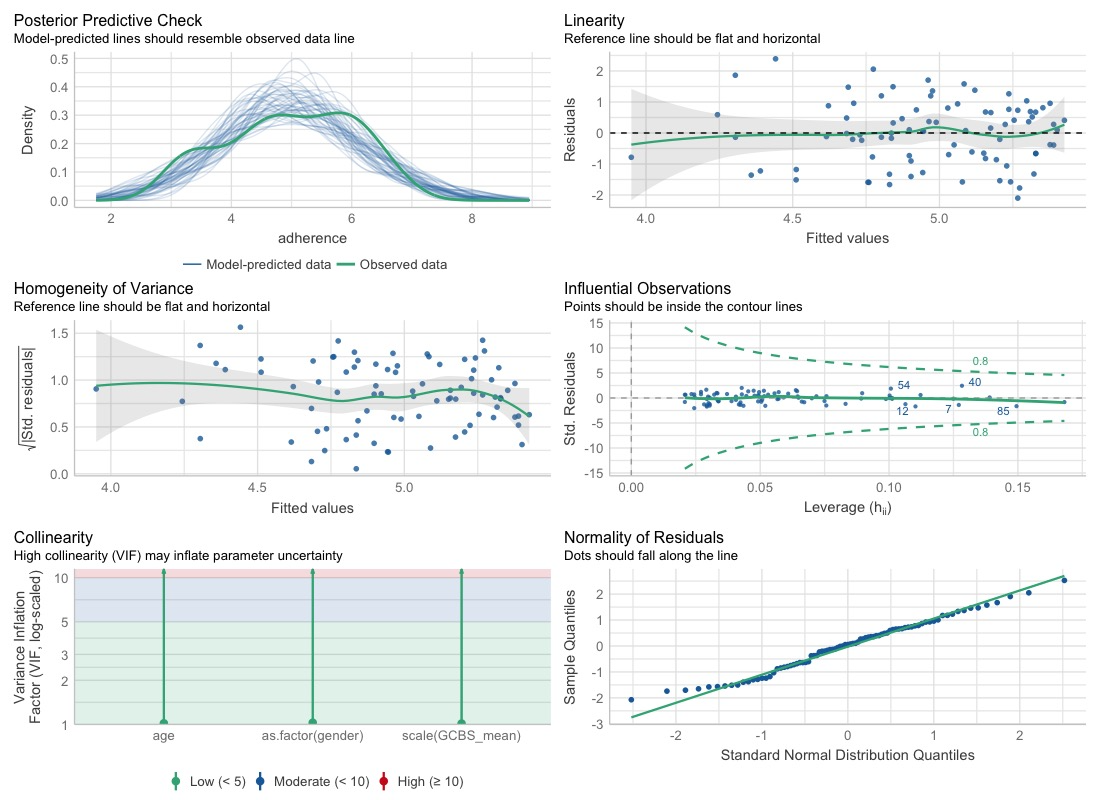

Supplement: Supplementary file 1 — Additional file 1. 1: Model assumptions of our confirmatory analyses. Figure S1: Visual check of model assumptions for the multiple regression of COVID-19-specific conspiracy beliefs and adherence to protective guidelines. Figure S2: Visual check of model assumptions for the multiple regression of generic conspiracy beliefs and adherence to protective guidelines. [file 13034_2022_554_MOESM1_ESM.docx]
